# Supplementary material for: Minimally Invasive Versus open AbdominoThoracic Esophagectomy for esophageal carcinoma (MIVATE) - study protocol for a randomized controlled trial DRKS00016773
Source: Research Square preprint supplement (doi:10.21203/rs.3.rs-22592/v2), 2020-11-05
Supplement: Supplementary file 1 [file 30d00f4c303b4394fba5c7d4.docx]

**Additional Table 1 | Fast-Track Esophagectomy Protocol on Esophageal Cancer Patient.**

*Ch* Charrière**,** *ICU* intensive care and intermediate care unit, *IV* intravenous, *NGT* nasogastric tube, *OR* operation room, *PCA* patient controlled analgesia, *POD* postoperative day, *PPI* proton pump inhibitor, *SOP* standard operating procedure, *WHO* World Health organization.

**Additional Table 2 | STOMA diet levels**.


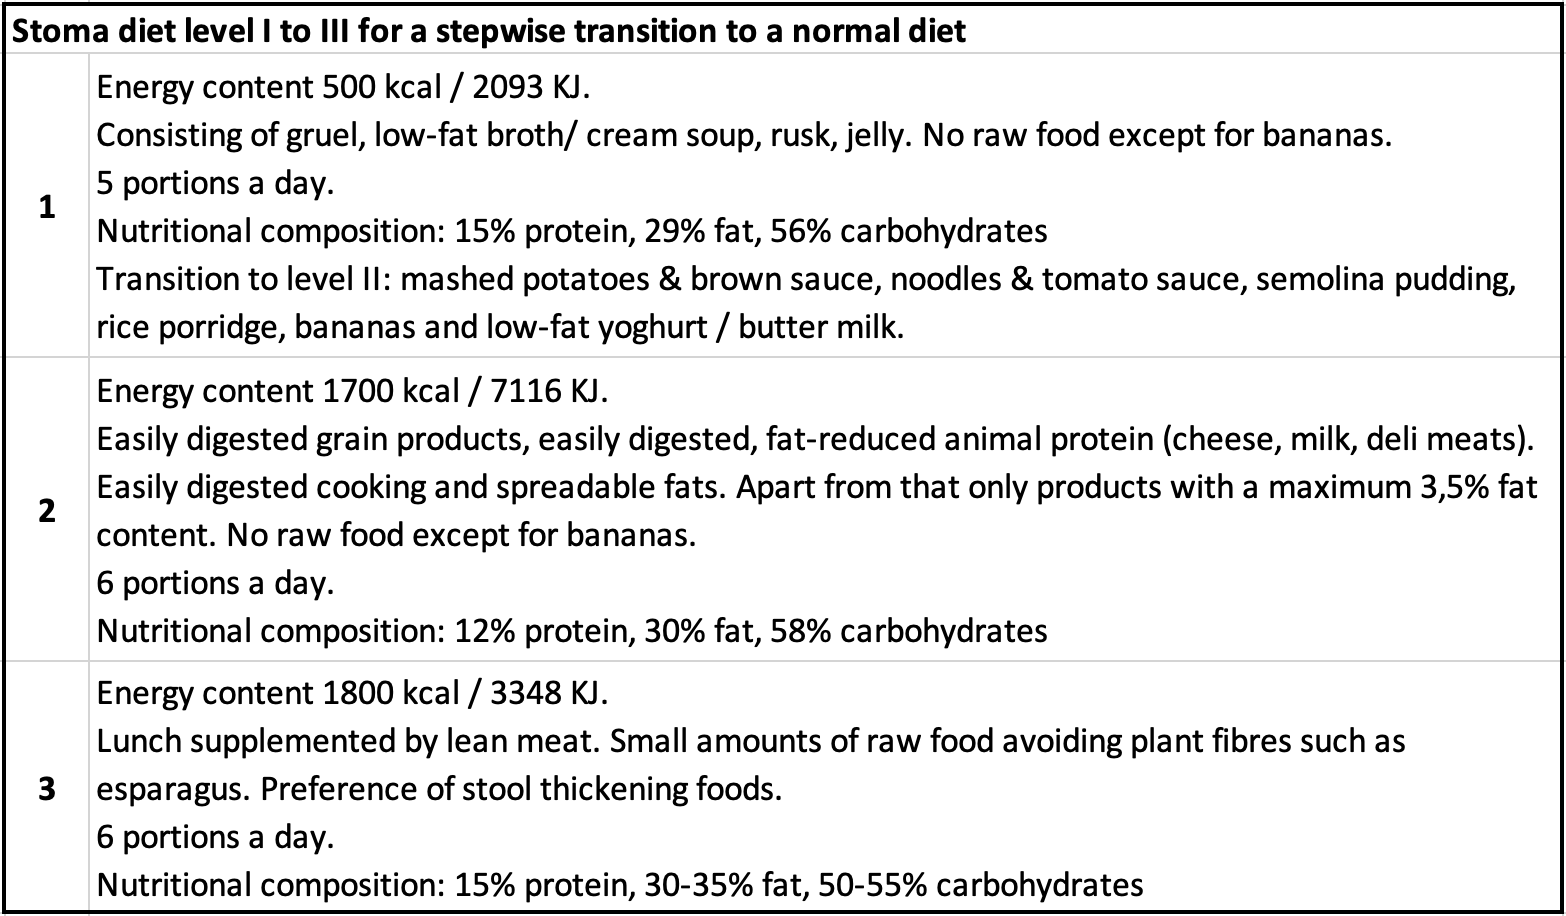


A scheme of a stepwise transition to a normal diet after visceral surgery according to in-house-standards of the University Hospital of Heidelberg.
